# Supplementary material
Source: publisher site journal article supplement (https://www.dovepress.com/article/342495)
Supplement: Supplementary file 1 [file get_supplementary_file.php]

**Appendix 1.** Prevalence (N, %) of allergic sensitization in 0-6 years old group and 7-14 years old group in different geographic areas

|  | Eastern (N=382) | | |  | | Western (N=380) | | |  |
| --- | --- | --- | --- | --- | --- | --- | --- | --- | --- |
| Specific IgE (N, %) | 0-6 yr | 7-14 yr | *P* | | 0-6 yr | | 7-14 yr | *P* | |
| (N=167) | (N=215) | (N=166) | | (N=214) |
| Mugwort | 23 (13.8) | 27 (12.6) | 0.727 | | 90 (54.2) | | 138 (64.5) | 0.043 | |
| Marguerite | 31 (18.6) | 39 (18.1) | 0.916 | | 88 (53.0) | | 127 (59.3) | 0.217 | |
| Dandelion | 11 (6.6) | 10 (4.7) | 0.410 | | 69 (41.6) | | 96 (44.9) | 0.521 | |
| Plantain | 17 (10.2) | 11 (5.1) | 0.060 | | 61 (36.7) | | 94 (43.9) | 0.158 | |
| Timothy | 8 (4.8) | 9 (4.2) | 0.776 | | 47 (28.3) | | 81 (37.9) | 0.051 | |
| Birch | 8 (4.8) | 10 (4.7) | 0.949 | | 39 (23.5) | | 55 (25.7) | 0.621 | |
| *Der p* | 115 (68.9) | 169 (78.6) | 0.031 | | 31 (18.7) | | 50 (23.4) | 0.268 | |
| *Der f* | 116 (69.5) | 170 (79.1) | 0.032 | | 26 (15.7) | | 49 (22.9) | 0.079 | |
| Cat | 10 (6.0) | 39 (18.1) | <0.001 | | 27 (16.3) | | 65 (30.4) | 0.001 | |
| Horse | 10 (6.0) | 27 (12.6) | 0.031 | | 12 (7.2) | | 9 (4.2) | 0.201 | |
| Dog | 5 (3.0) | 22 (10.2) | 0.006 | | 23 (13.9) | | 38 (17.8) | 0.304 | |
| Any pollen | 46 (27.5) | 54 (25.1) | 0.592 | | 100 (60.2) | | 150 (70.1) | 0.045 | |
| Any mite | 119 (71.3) | 173 (80.5) | 0.035 | | 36 (21.7) | | 54 (25.2) | 0.420 | |
| Any animal | 18 (10.8) | 58 (27.0) | <0.001 | | 36 (21.7) | | 72 (33.6) | 0.010 | |
| Any allergen | 129 (77.2) | 185 (86.0) | 0.026 | | 115 (69.3) | | 164 (76.6) | 0.107 | |

Notes: *Der p*（*D. pteronyssinus*）；*Der f*（*D. farina*）；Any allergen included positive SIgE to any of allergens mentioned in pollen and mite and animal.

**Appendix 2.** Prevalence of allergic sensitization in children Eastern and Western in different age groups

|  | 0-6 yr (N=333) | |  | 7-14 yr (N=429) | |  |
| --- | --- | --- | --- | --- | --- | --- |
| Specific IgE  (N, %) | Eastern | Western | *P* | Eastern | Western | *P* |
| (N=167) | (N=166) | (N=215) | (N=214) |
| Mugwort | 23 (13.8) | 90 (54.2) | <0.001 | 27 (12.6) | 138 (64.5) | <0.001 |
| Marguerite | 31 (18.6) | 88 (53.0) | <0.001 | 39 (18.1) | 127 (59.3) | <0.001 |
| Dandelion | 11 (6.6) | 69 (41.6) | <0.001 | 10 (4.7) | 96 (44.9) | <0.001 |
| Plantain | 17 (10.2) | 61 (36.7) | <0.001 | 11 (5.1) | 94 (43.9) | <0.001 |
| Timothy | 8 (4.8) | 47 (28.3) | <0.001 | 9 (4.2) | 81 (37.9) | <0.001 |
| Birch | 8 (4.8) | 39 (23.5) | <0.001 | 10 (4.7) | 55 (25.7) | <0.001 |
| *Der p* | 115 (68.9) | 31 (18.7) | <0.001 | 169 (78.6) | 50 (23.4) | <0.001 |
| *Der f* | 116 (69.5) | 26 (15.7) | <0.001 | 170 (79.1) | 49 (22.9) | <0.001 |
| Cat | 10 (6.0) | 27 (16.3) | 0.003 | 39 (18.1) | 65 (30.4) | 0.003 |
| Horse | 10 (6.0) | 12 (7.2) | 0.649 | 27 (12.6) | 9 (4.2) | 0.002 |
| Dog | 5 (3.0) | 23 (13.9) | <0.001 | 22 (10.2) | 38 (17.8) | 0.025 |
| Any pollen | 46 (27.5) | 100 (60.2) | <0.001 | 54 (25.1) | 150 (70.1) | <0.001 |
| Any mite | 119 (71.3) | 36 (21.7) | <0.001 | 173 (80.5) | 54 (25.2) | <0.001 |
| Any animal | 18 (10.8) | 36 (21.7) | 0.007 | 58 (27.0) | 72 (33.6) | 0.133 |
| Any allergen | 129 (77.2) | 115 (69.3) | 0.100 | 185 (86.0) | 164 (76.6) | 0.012 |

Notes: *Der p*（*D. pteronyssinus*）；*Der f*（*D. farina*）；Any allergen included positive sIgE to any of allergens mentioned in pollen and mite and animal.
